# Supplementary material for: Spatial ecology of Haemophilus and Aggregatibacter in the human oral cavity
Source: PubMed Central journal article supplement (PMC10986600; doi:10.1128/spectrum.04017-23), 2024-03-15
Supplement: spectrum.04017-23-s0002.pdf [file spectrum.04017-23-s0002.pdf]

(a)

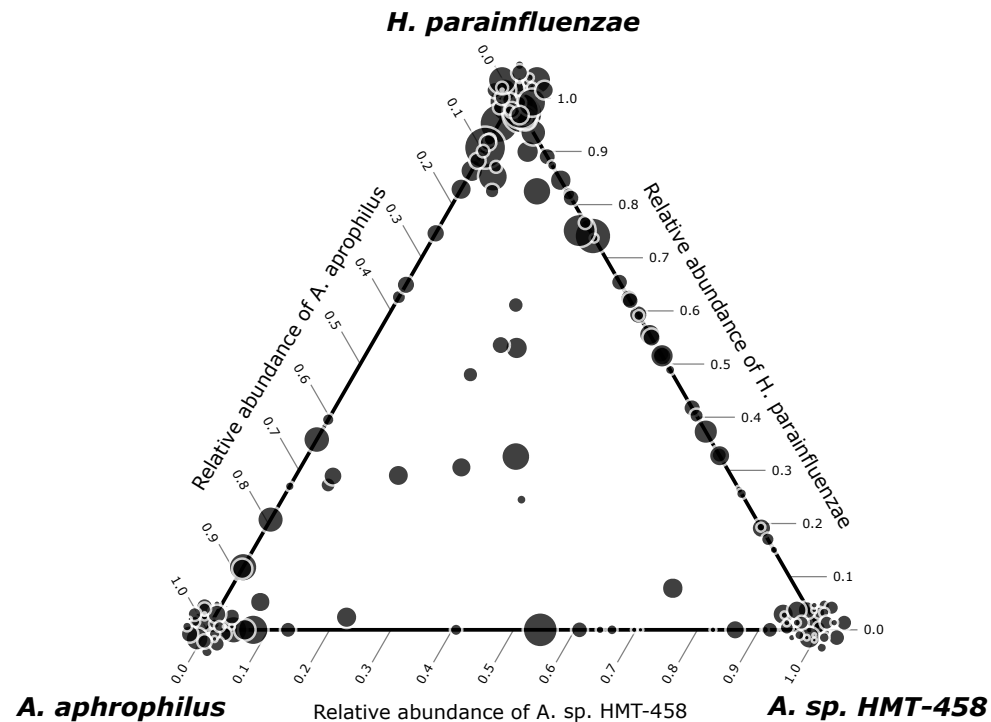

(b)

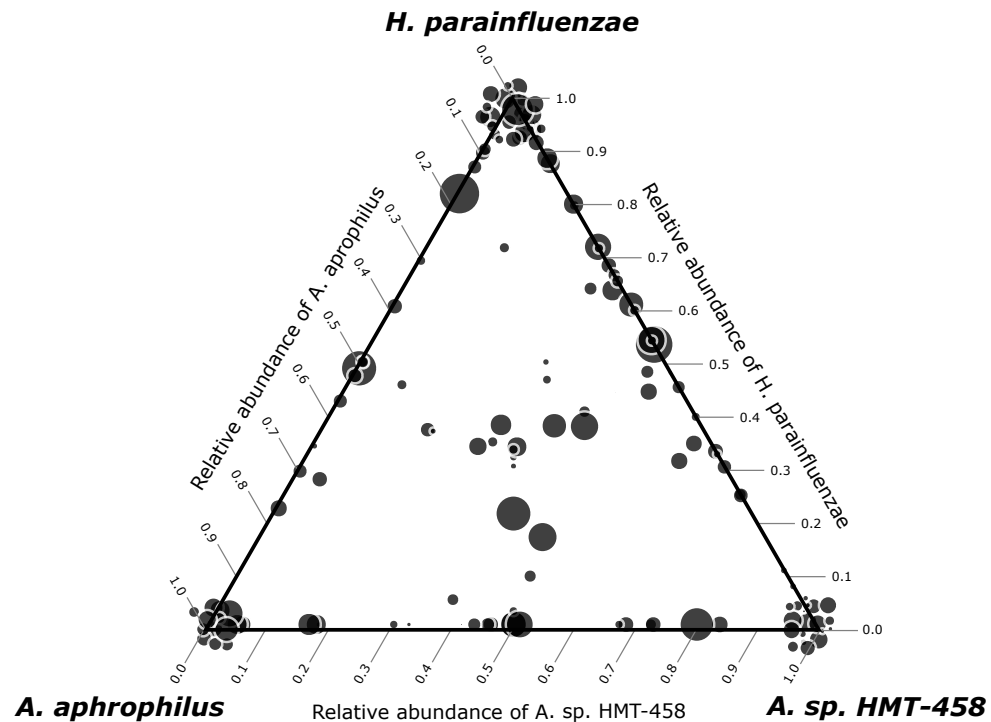

| Total | Total corner (fraction) | H. para corner (fraction) | A. aphro corner (fraction) | A. HMT-458 corner (fraction) | Total edge (fraction) | H. para - A. aphro edge (fraction) | A. aphro - A. HMT-458 edge (fraction) | H. para - A. HMT-458 edge (fraction) | Interior (fraction) |
|-------|-------------------------|---------------------------|----------------------------|------------------------------|-----------------------|------------------------------------|---------------------------------------|--------------------------------------|---------------------|
| 168   | 97 (0.578)              | 36 (0.214)                | 29 (0.173)                 | 32 (0.190)                   | 52 (0.310)            | 12 (0.171)                         | 10 (0.060)                            | 30 (0.179)                           | 19 (0.113)          |

| Total | Total corner (fraction) | H. para corner (fraction) | A. aphro corner (fraction) | A. HMT-458 corner (fraction) | Total edge (fraction) | H. para - A. aphro edge (fraction) | A. aphro - A. HMT-458 edge (fraction) | H. para - A. HMT-458 edge (fraction) | Interior (fraction) |
|-------|-------------------------|---------------------------|----------------------------|------------------------------|-----------------------|------------------------------------|---------------------------------------|--------------------------------------|---------------------|
| 168   | 63 (0.375)              | 27 (0.161)                | 15 (0.089)                 | 20 (0.119)                   | 57 (0.339)            | 14 (0.083)                         | 18 (0.107)                            | 25 (0.149)                           | 49 (0.292)          |
