# Supplementary material for: Spatial ecology of Haemophilus and Aggregatibacter in the human oral cavity
Source: PubMed Central journal article supplement (PMC10986600; doi:10.1128/spectrum.04017-23), 2024-03-15

Mean depth of coverage (X)  
of *H. parainfluenzae* &  
OadA1 gene

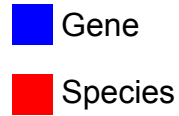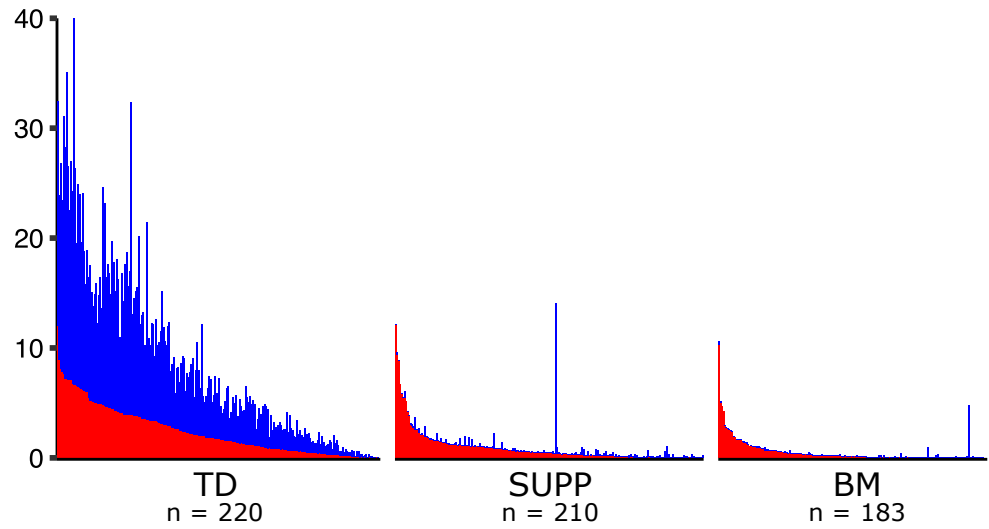

Mean depth of coverage (X)  
of *H. parainfluenzae* M1C142-1  
(GCA\_014931375.1) &  
OadA1 gene

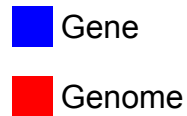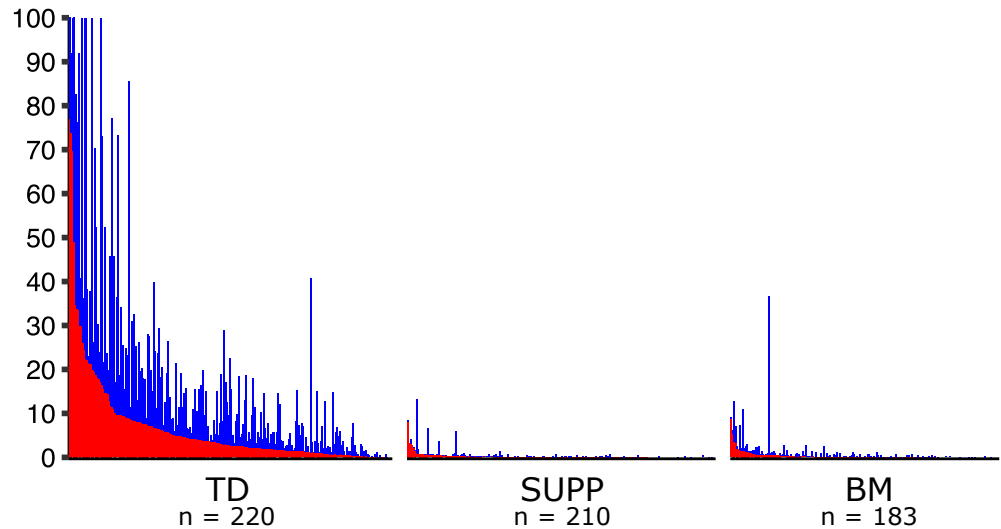

Supplement: spectrum.04017-23-s0003.pdf [file spectrum.04017-23-s0003.pdf]
