# Supplementary material for: Spatial ecology of Haemophilus and Aggregatibacter in the human oral cavity
Source: PubMed Central journal article supplement (PMC10986600; doi:10.1128/spectrum.04017-23), 2024-03-15

Mean depth of coverage (X)  
of *H. parainfluenzae* &  
BioA gene

■ Gene

■ Species

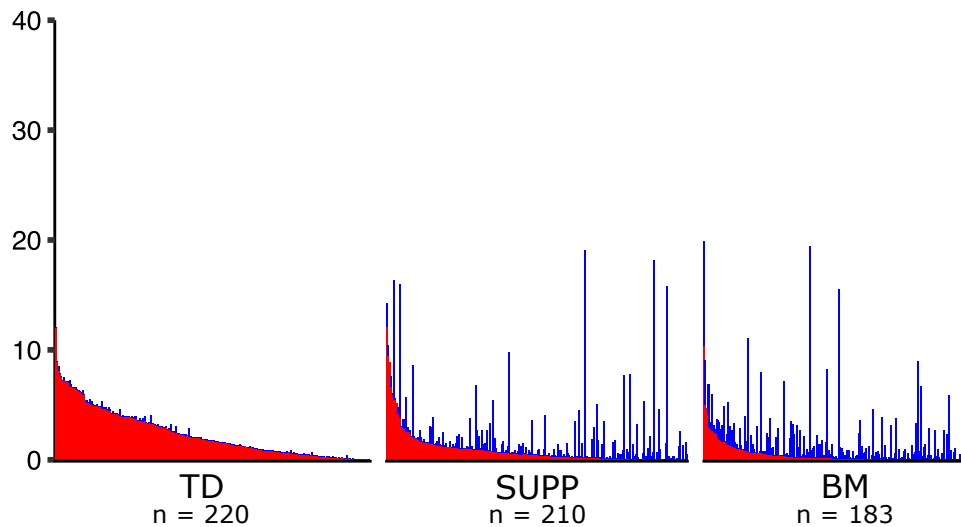

Mean depth of coverage (X)  
of *H. parainfluenzae* CCUG-58848  
(GCA\_001679405.1) &  
BioA gene

■ Gene

■ Genome

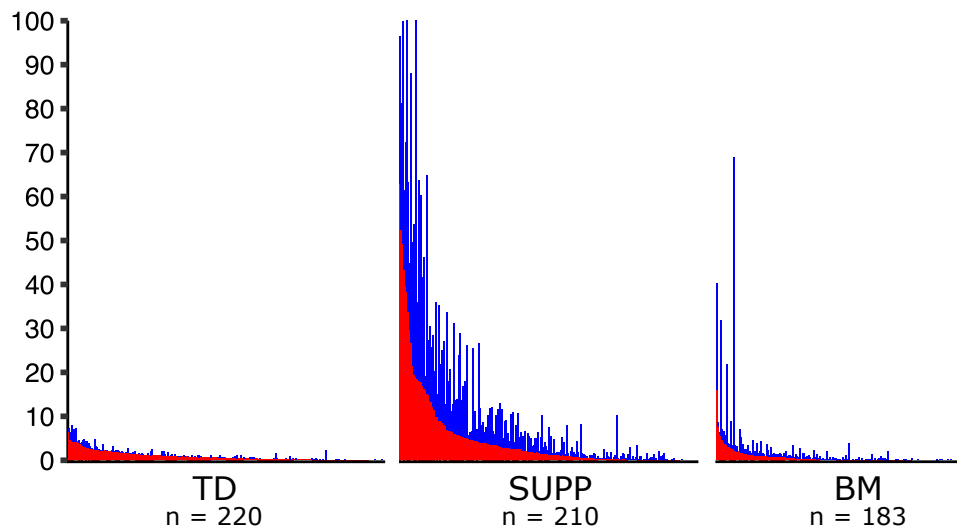

Supplement: spectrum.04017-23-s0007.pdf [file spectrum.04017-23-s0007.pdf]
