# Supplementary material for: Spatial ecology of Haemophilus and Aggregatibacter in the human oral cavity
Source: PubMed Central journal article supplement (PMC10986600; doi:10.1128/spectrum.04017-23), 2024-03-15

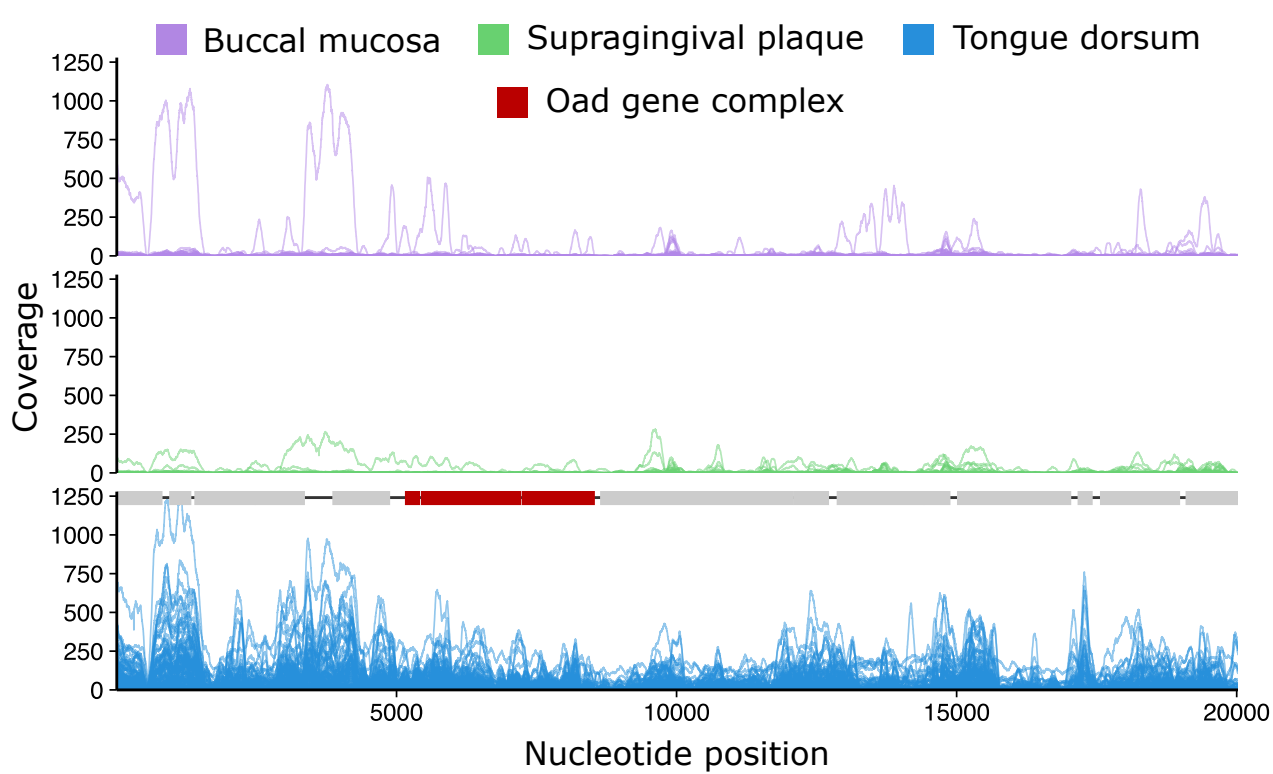

Supplement: spectrum.04017-23-s0008.pdf [file spectrum.04017-23-s0008.pdf]
